# Supplementary material for: Gastric Enteric Glial Cells: A New Contributor to the Synucleinopathies in the MPTP-Induced Parkinsonism Mouse
Source: MDPI journal article supplement (doi:10.3390/molecules27217414), 2022-11-01
Supplement: s1 [file s1]

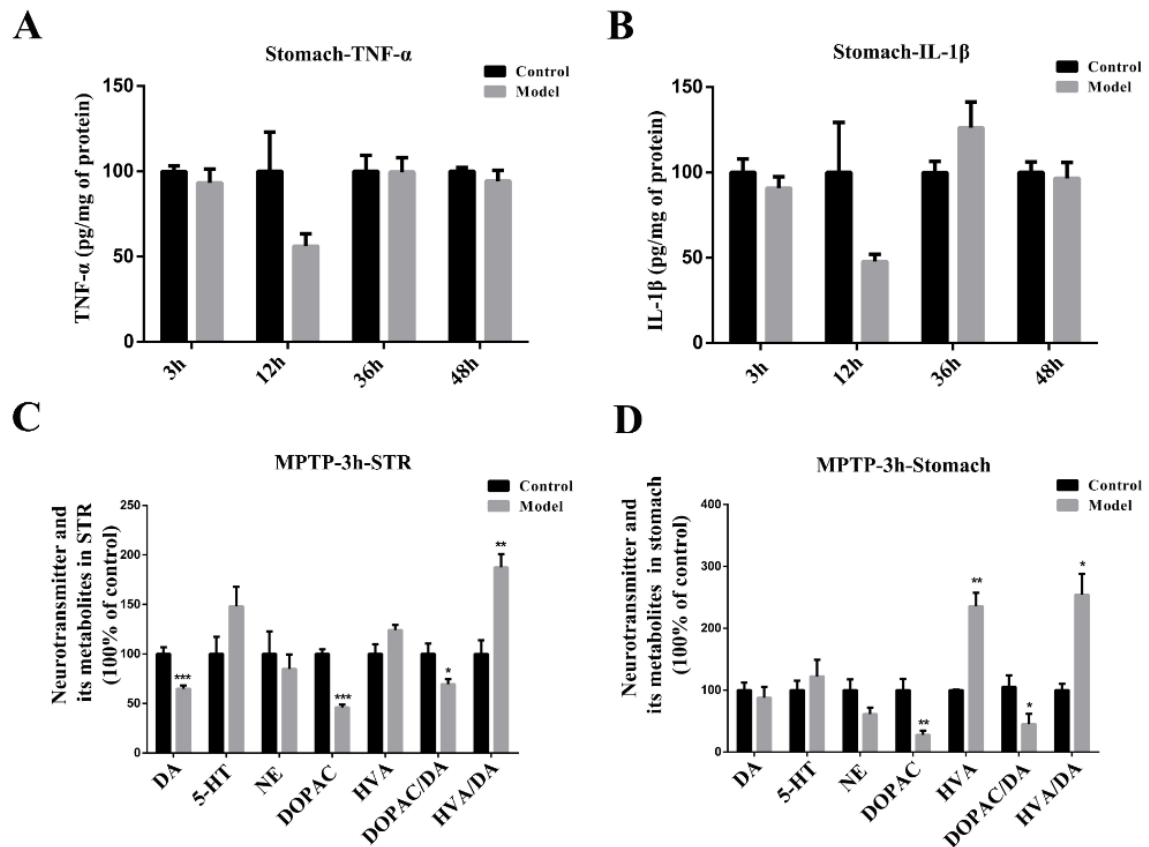

Figure S1. Cytokine and neurotransmitter changes in the stomachs of the single MPTP injection model. Histograms representing the levels of a TNF- $\alpha$  and b IL-1 $\beta$  normalized to total protein levels 3 h, 12 h, 36 h, and 48 h after a single MPTP injection in the stomach measured by ELISA are shown ( $n = 4$ ). Histograms representing the levels of the main neuro-transmitters and their metabolites 3 h after MPTP injection in the c STR and d stomach across groups are shown ( $n = 5$ ). The data are presented as the means  $\pm$  SEM, \*  $p < 0.05$ , \*\*  $p < 0.01$  compared with the control group.
